# Supplementary material for: Metabolomic profile of diet-induced obesity mice in response to humanin and small humanin-like peptide 2 treatment
Source: PubMed Central journal article supplement (PMC6554247; doi:10.1007/s11306-019-1549-7), 2019-06-06

(A)

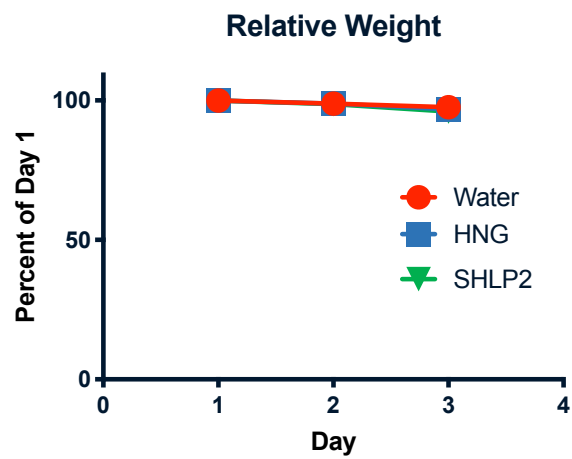

(B)

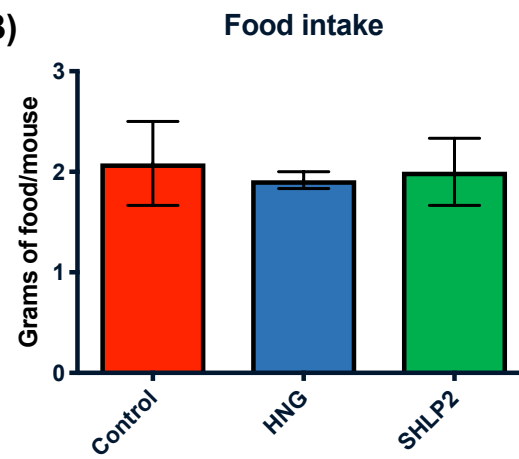

Supplement: 11306_2019_1549_MOESM1_ESM.pdf [file 11306_2019_1549_MOESM1_ESM.pdf]
